# Supplementary material
Source: PubMed Central journal article supplement (PMC4638411)

## Supplemental Figure 1

**A**

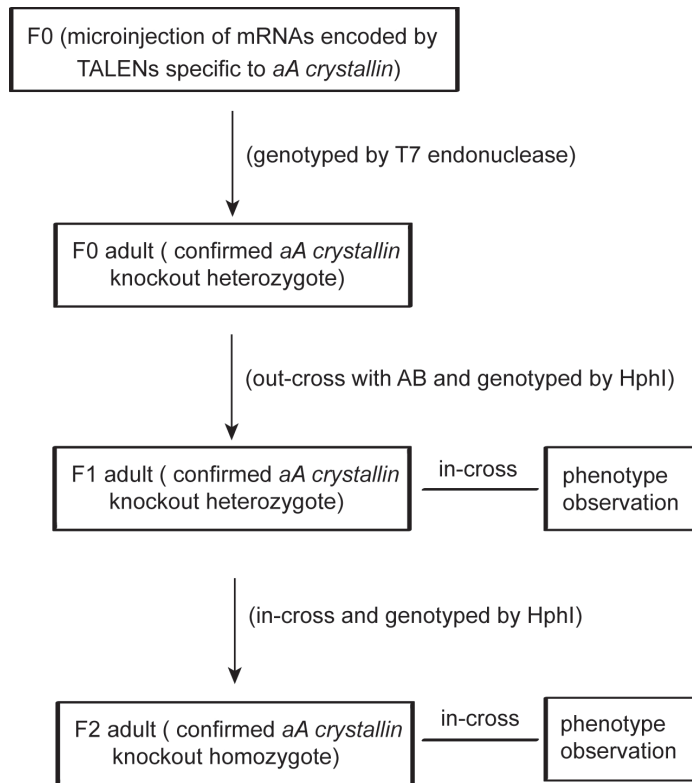

**B**

*Forward Primer*

CTTTGTACTGTACTAGCCTCTATTAGCCTCCTACTTGC GTTCAGTTCACATCTTTTGTTTCATCAGGTGCA  
 ATAAGTTACAGTAAGGAGTTACCAGGTCTGACATTATGGATATTGCGATCCAACACCCTTGGTTCAGACG  
 CACACTGGGCTACCCACCCGACTCTTTGATCAGTTCTTTGGAGAAGGCCTGTTTCGATTATGACCTATTC  
 CCCTCACCACCTCAACTGTCAGCCCTTACTATCGACACTCACTCTTCGCAACATCCTGGACTCCTCCA  
 ACTCAGGTGTCTCTGAGGTATTGAATTACTTTATTGCTAATTGAGAGAATATTTTGATTTACTAACTTAA  
 ATGATGCTGAAAACCACTATGCGGGAGCGGGGTGAAGGTTGTGTGTGCGGGGGT CAGGGGGGATTCATAT

*Reverse Primer*

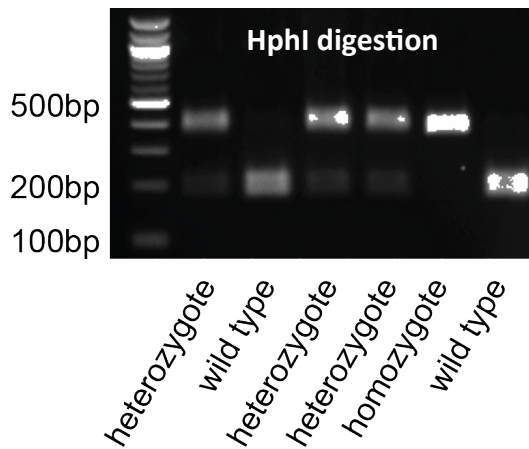

## Supplemental Figure 2

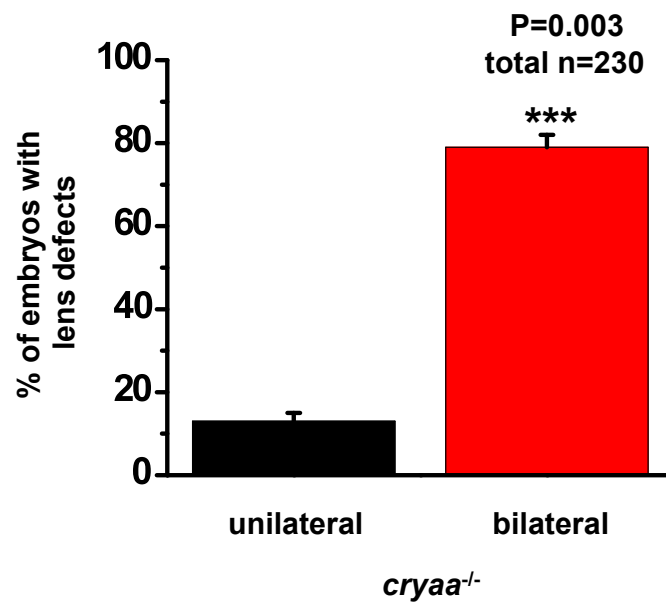

Supplement: NIHMS708963-supplement-3.pdf [file NIHMS708963-supplement-3.pdf]
