# Supplementary material
Source: PubMed Central journal article supplement (PMC4638411)

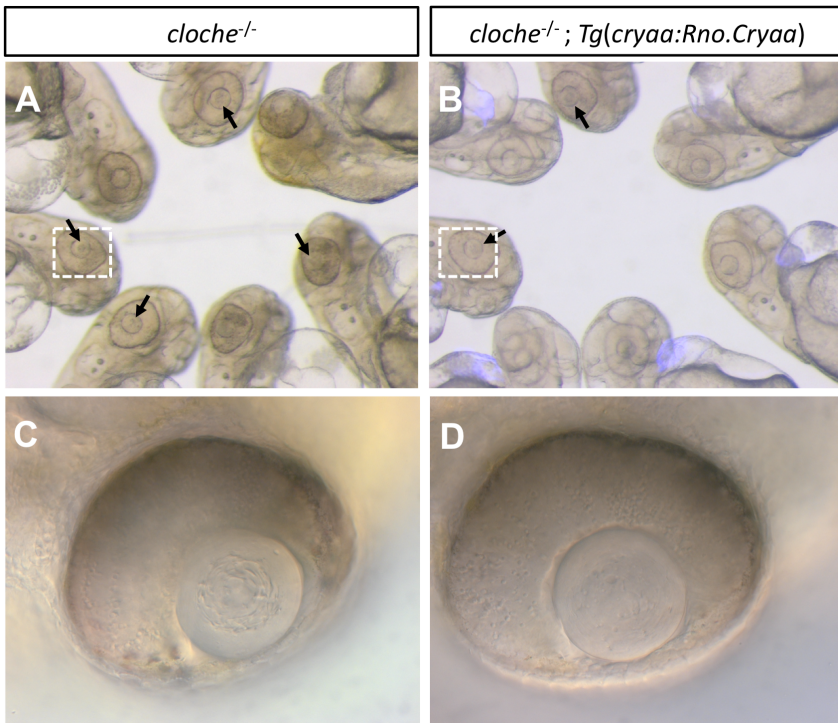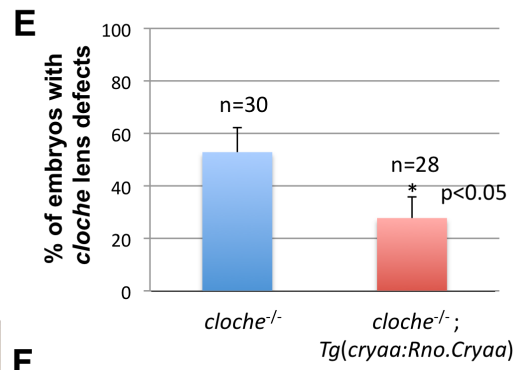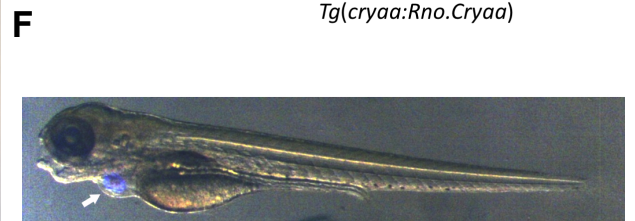

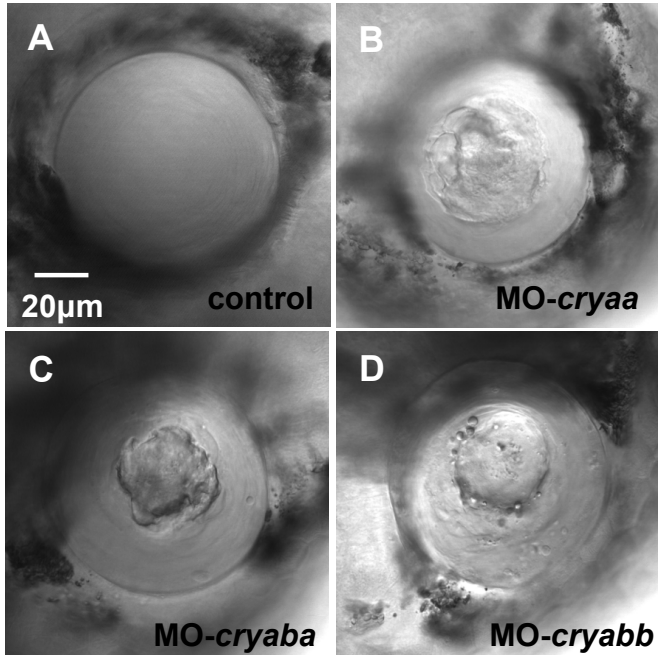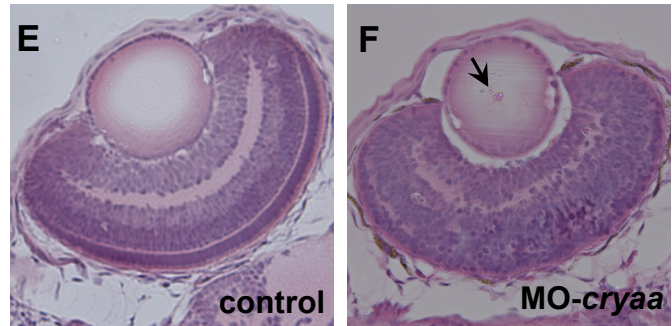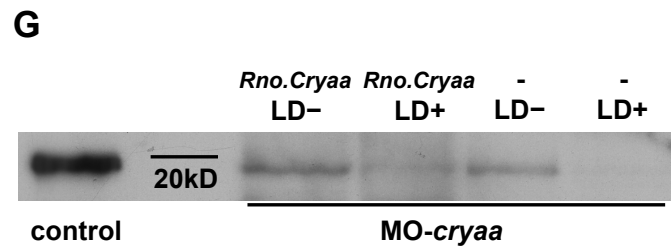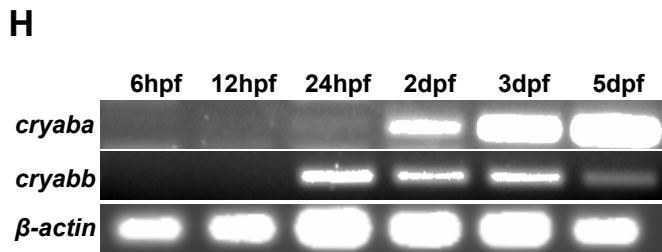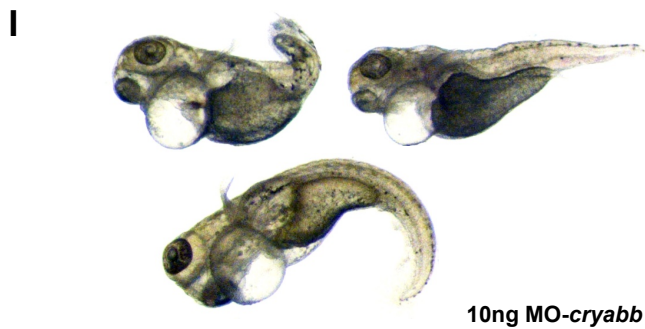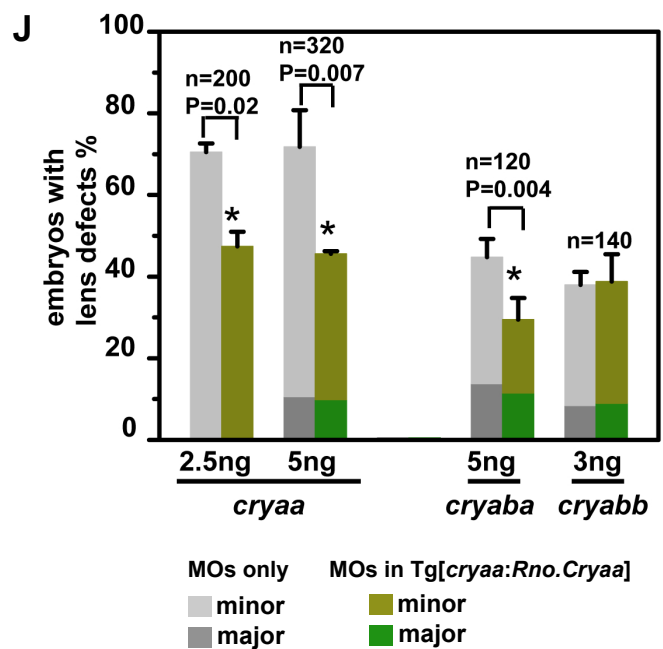

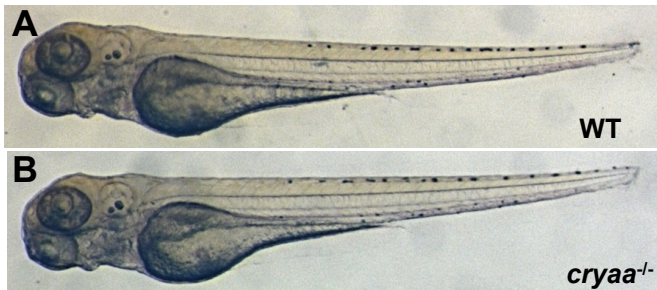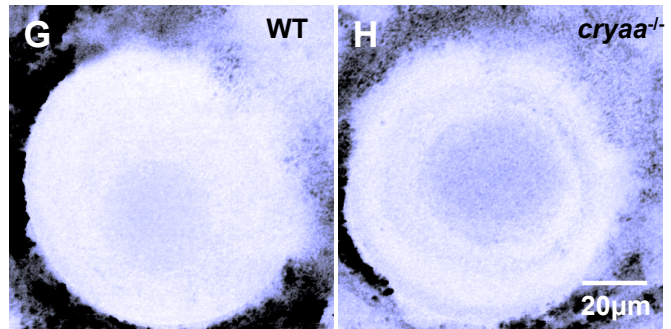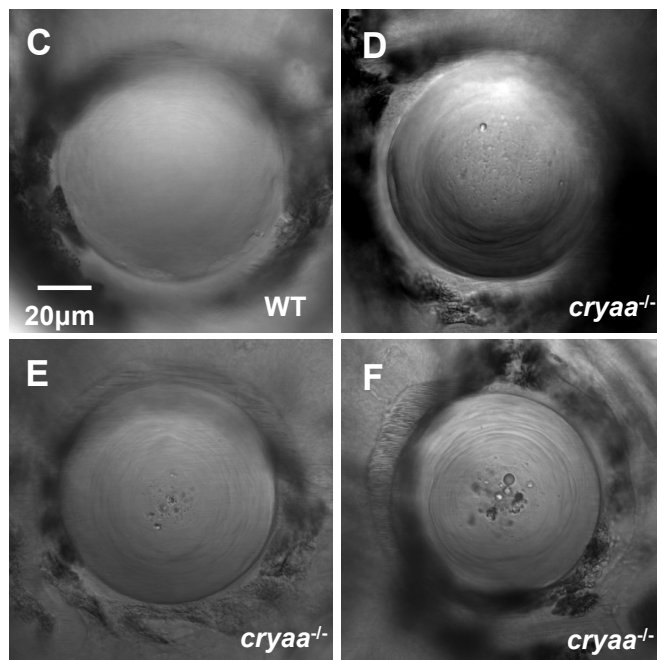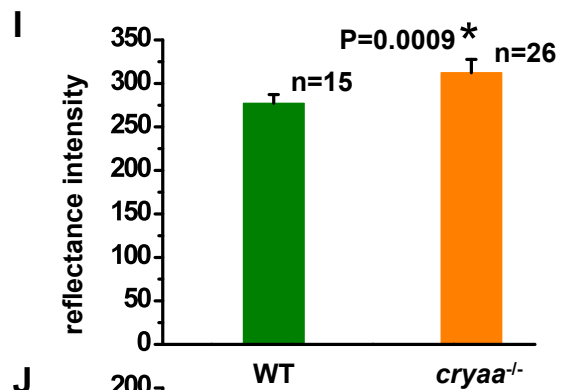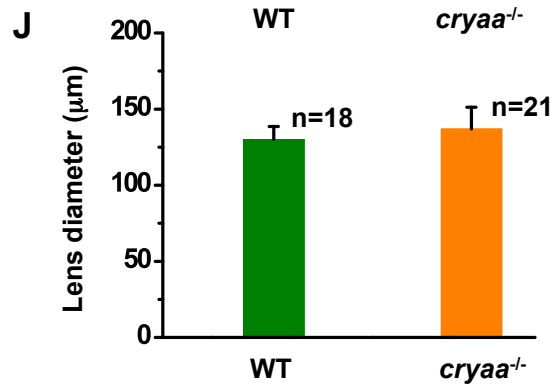

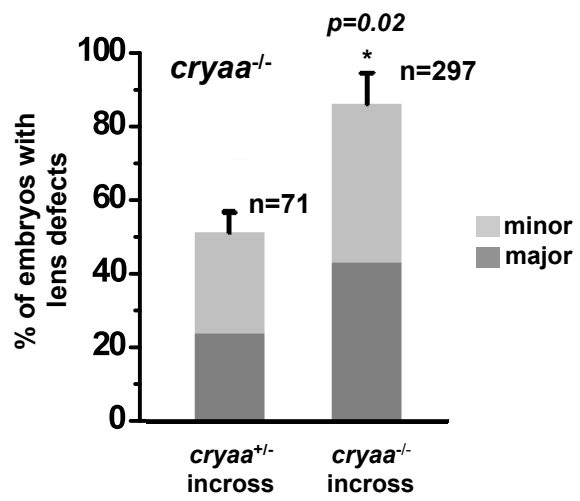

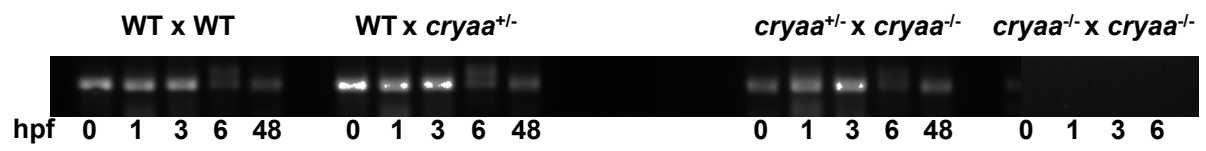

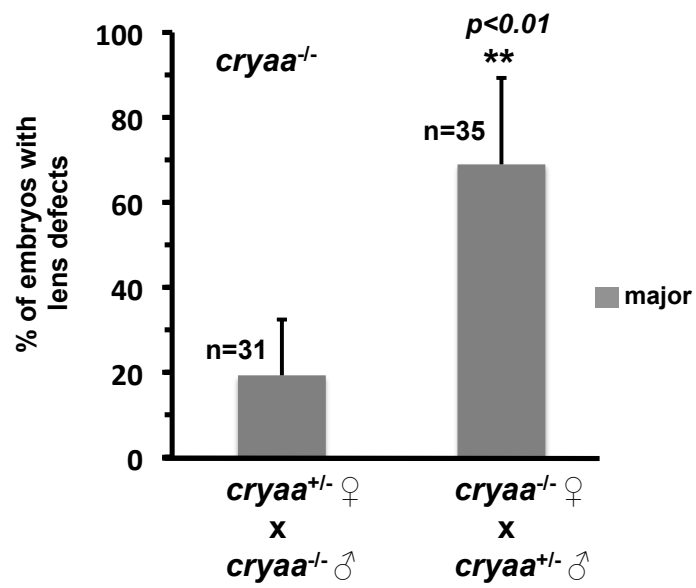

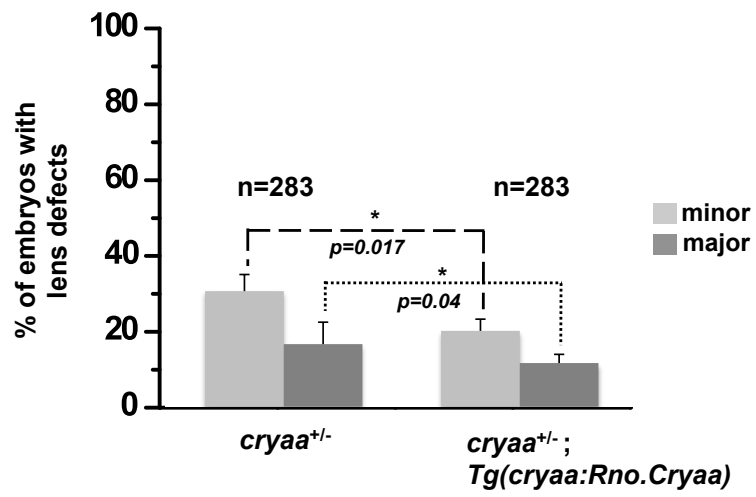

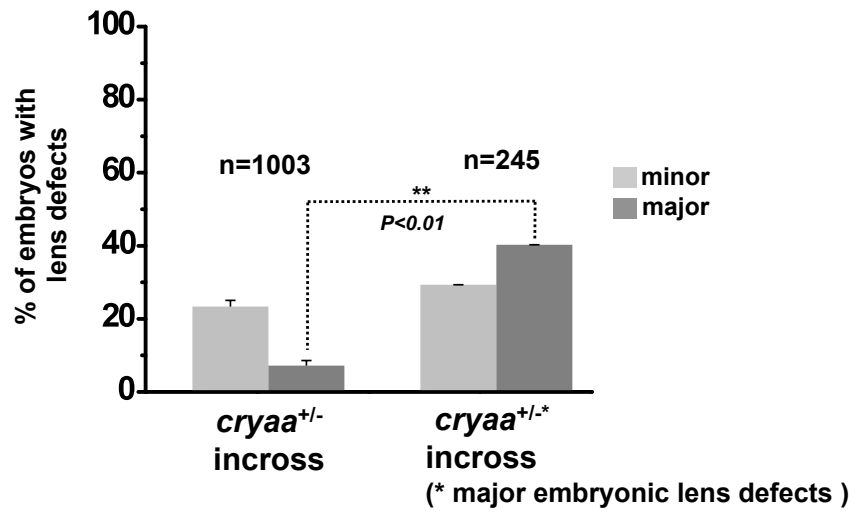

Supplement: NIHMS708963-supplement-2.pdf [file NIHMS708963-supplement-2.pdf]
